# Supplementary material for: A new reactivity pattern of low-valent transition-metal hydroxo complexes: straightforward synthesis of hydrosulfido complexes via reaction with carbon disulfide
Source: Royal Society of Chemistry journal article supplement (doi:10.1039/b210860g), 2003-01-01
Supplement: b210860g.doc [file b210860g.doc]

## Supplementary Information

----------------------------------------------------------------------------------------------------------

## Experimental Section

**General Procedures.** All manipulations were carried out under dinitrogen using standard Schlenk techniques. Solvents were distilled from Na (hexanes) and CaH2 (CH2Cl2). CD2Cl2 was dried over 4Å molecular sieves and stored in the dark over Na2CO3. Elemental analyses were obtained using a Perkin-Elmer 240-B microanalyzer. The IR, 1H and 13C NMR spectra were recorded on Perkin-Elmer FT 1720-X (over the range 2200-1600 cm-1), and Bruker AC-200 (or AC-300) spectrometers respectively.

**X-ray structures**. Data in common: Bruker AXS SMART 1000 CCD diffractometer, **and** scans, MoKradiation ( 0.71073 Å), graphite monochromator, *T* = 295 K. Raw frame data integrated with SAINT[[1]](#footnote-2) program. Structures were solved by direct methods with SHELXTL.[[2]](#footnote-3) Semi-empirical absorption correction with SADABS.[[3]](#footnote-4) All non-hydrogen atoms were refined anisotropically. Hydrogen atoms were set in calculated positions and refined as riding atoms, with a common thermal parameter. All calculations were made with SHELXTL

**[Mo(OH)(3-C3H4-Me-2)(CO)2(phen)](1).** KOH (0.5 mL of a 5 M solution in H2O, excess) was added to a solution of [MoCl(3-C3H4-Me-2)(CO)2(phen)] (0.100 g, 0.237 mmol) in CH2Cl2 (20 mL). After stirring for 12 hours, the mixture was cooled to –78 ºC and the organic phase was separated from the ice formed using filtration through a cannula tipped with filter paper. The resulting dark red solution was concentrated under reduced pressure to a volume of 10 mL, and addition of hexane (30 mL) caused precipitation of **1** as a dark red microcrystalline solid. Yield: 0.082 g, 86 %. Anal. Calcd. for C18H16MoN2O3: C, 53.48; H, 3.99; N, 6.93. Found: C, 53.21. H, 3.78; N, 7.02. IR(CH2Cl2): 1935, 1844 (CO); (KBr): 3728 (OH). 1H NMR(CD2Cl2): 9.11, 8.45 [m, 2H each, phen] 7.92 [s, 2H, phen], 7.79 [m, 2H, phen], 2.98 [s, 2H, H*syn*], 2.90 [s(br), 1H, O*H*], 1.27 [s, 2H, H*anti*], 0.84 [s, 3H, 3-C3H4-C*H3*-2]. The 13C NMR spectrum of this compound is identical to that reported for the hydrate reported in reference 6a.

**[Re(OH)(CO)3(bpy)](2).** KOH ( 0.090 mL of a 4 M solution in H2O) was added to a solution of [Re(OTf)(CO)3(bpy)] (0,200 g, 0.347 mmol) in CH2Cl2 (20 mL). The mixture was allowed to stir at room temperature for 1 hour and then the solvent was evaporated to dryness under reduced pressure. The residue was extracted with CH2Cl2 (3  20 mL) and filtered via cannula. The resulting orange solution was concentrated to a volume of 10 mL, and addition oh hexane (20 mL) caused precipitation of **2** as an orange solid. Yield: 0.138 g, 89 %. Anal. Calcd. for C13H9N2O4Re·2H2O: C, 32.57; H, 2.73; N, 5.84. Found: C, 32.51. H, 2.70; N, 5.87. IR(CH2Cl2): 2009, 1899, 1890 (CO); (KBr): 3626 (OH). 1H NMR(CD2Cl2): 8.98, 8.27, 8.10 and 7.55 [m, 2H each, bpy], 1.63 [s(br), 5H, O*H* and 2*H*2O].

**Reaction of [Mo(OH)(3-C3H4-Me-2)(CO)2(phen)](1) with CS2.** CS2 (9 L, 0.124 mmol) was added to a solution of **1** (0.050 g, 0.124 mmol) in CH2Cl2,. After 5 minutes stirring at room temperature, the volatiles were evaporated under reduced pressure and the residue was washed with hexane (3  15 mL). Slow difussion of hexane into a solution of [Mo(SH)(3-C3H4-Me-2)(CO)2(phen)](**3**) in CH2Cl2 (10 mL) at –30 ºC afforded dark red crystals of **3**. A single crystal obtained in this way was used for the X-ray analysis. Yield: 0.045 g, 87%. Anal. Calcd. for C18H16MoN2O2S: C, 51.43; H, 3.84; N, 6.66. Found: C, 51.61. H, 3.76; N, 6.92. IR(CH2Cl2): 1940, 1857 (CO); (KBr): 2359 (SH). 1H NMR(CD2Cl2): 9.01, 8.45 [m, 2H each, phen] 7.95 [s, 2H, phen], 7.79 [m, 2H, phen], 2.86 [s, 2H, H*syn*], 1.58 [s, 2H, H*anti*], 0.62 [s, 3H, 3-C3H4-C*H3*-2], -0.60 [s, 1H, S*H*].13C NMR (CD2Cl2): 230.23 [CO], 152.07, 144.47, 137.07, 130.53, 127.62 and 125.09 [phen], 85.53 [C2 of 3-C3H4-Me-2], 52.75 [C1 and C3 of 3-C3H4-Me-2], 18.91 [3-C3H4-*C*H3-2].

**Reaction of [Re(OH)(CO)3(bpy)](2) with CS2.** CS2 (13 L, 0.179 mmol) was added to a solution of **2** (0.080 g, 0.179 mmol) in CH2Cl2 (20 mL), causing an inmediate color change from orange to red. The resulting solution was concentrated under reduced pressure to a volume of 10 mL and layered with hexane, affording crystals of **4**, one of which was used for the structure determination by X-ray diffraction. Yield: 0.070 g, 84 %. Anal. Calcd. for C13H9N2O3ReS: C, 33.98; H, 1.97; N, 6.10. Found: C, 33.91; H, 1.93; N, 6.03. IR(CH2Cl2): 2011, 1910, 1891 (CO). 1H NMR(CD2Cl2): 9.01, 8.22, 8.05 and 7.50 [m, 2H each, bpy], -2.43 [s(br), 1H, S*H*]. 13C NMR(CD2Cl2): 199.49 [2CO], 190.69 [CO], 155.52, 153.47, 138.96, 127.33 and 123.60 [bpy].

**[Re(OH)(CO)3(Me2-bpy)](5).** Following the procedure described above for **2**, **5** was prepared by reaction of [Re(OTf)(CO)3(Me2-bpy)] (0,200 g, 0.333 mmol) and KOH (0.140 mL of a 4 M solution in H2O, 0.350 mmol) in CH2Cl2 (20 mL). Yield: 0.133 g, 85 %. Anal. Calcd. for C15H13N2O4Re: C, 38.21; H, 2.77; N, 5.94. Found: C, 38.27. H, 2.79; N, 5.90. IR(CH2Cl2): 2009, 1898, 1880 (CO); (KBr): 3630 (OH). 1H NMR(CD2Cl2): 8.84 [d(5.5 Hz), 2H, Me2-bpy], 8.07 [s, 2H, Me2-bpy], 7.35 [d(5.5 Hz), 2H, Me2-bpy], 2.56 [s, 6H, Me2-bpy], 0.71 [s(br), 1H, O*H*]. 13C NMR(CD2Cl2): 200.77 [2CO], 194.91 [CO], 155.71, 152.18, 151.88, 127.93, 124.77 and 21.78 [Me2-bpy].

**Reaction of [Re(OH)(CO)3(Me2-bpy)](5) with CS2.** CS2 (12 L, 0.169 mmol) was added to a solution of **5** (0.080 g, 0.169 mmol) in CH2Cl2 (20 mL), causing an inmediate color change from orange to red. Similar workup as described for **4** afforded **6** as an orange solid. Yield: 0.065 g, 80 %. Anal. Calcd. for C15H13N2O3ReS: C, 36.95; H, 2.68; N, 5.74. Found: C, 36.92; H, 2.73; N, 5.69. IR(CH2Cl2): 2010, 1910, 1889 (CO). 1H NMR(CD2Cl2): 8.83 [d(5.5 Hz), 2H, Me2-bpy], 8.02 [s, 2H, Me2-bpy], 7.32 [d(5.5 Hz), 2H, Me2-bpy], 2.57 [s, 6H, Me2-bpy], -2.45 [s(br), 1H, S*H*].

**Independent synthesis of the hydrosulfido complexes.**

**[Mo(SH)(3-C3H4-Me-2)(CO)2(phen)](3).** A solution of NaHS (0.015 g, 0.260 mmol) in MeOH (2 mL) was added to a solution of [MoCl(3-C3H4-Me-2)(CO)2(phen)] (0.100 g, 0.237 mmol) in CH2Cl2 (20 mL). The mixture was allowed to stir at room temperature for 45 minutes and then was evaporated to dryness. The residue was extracted with CH2Cl2 (3  15 mL), filtered through Celite and the resulting solution was concentrated under reduced pressure to a volume of 10 mL. Addition of hexane (30 mL) caused the precipitation of **3** as a dark red microcrystalline solid which was washed with hexane (3  10 mL) and dried in vacuo. Yield: 0.091 g, 92%. The product exhibits the same spectroscopic properties as the compound obtained by reaction of **1** with CS2.

**[Re(SH)(CO)3(bpy)](4).** The procedure was similar to that described above for the preparation of **3**, starting from [Re(OTf)(CO)3(bpy)] (0.100 g, 0.173 mmol), NaHS (0.010 g, 0.178 mmol) and MeOH (2 mL). Yield: 0.069 g, 87%. The product exhibits the same spectroscopic properties as the compound obtained by reaction of **2** with CS2.


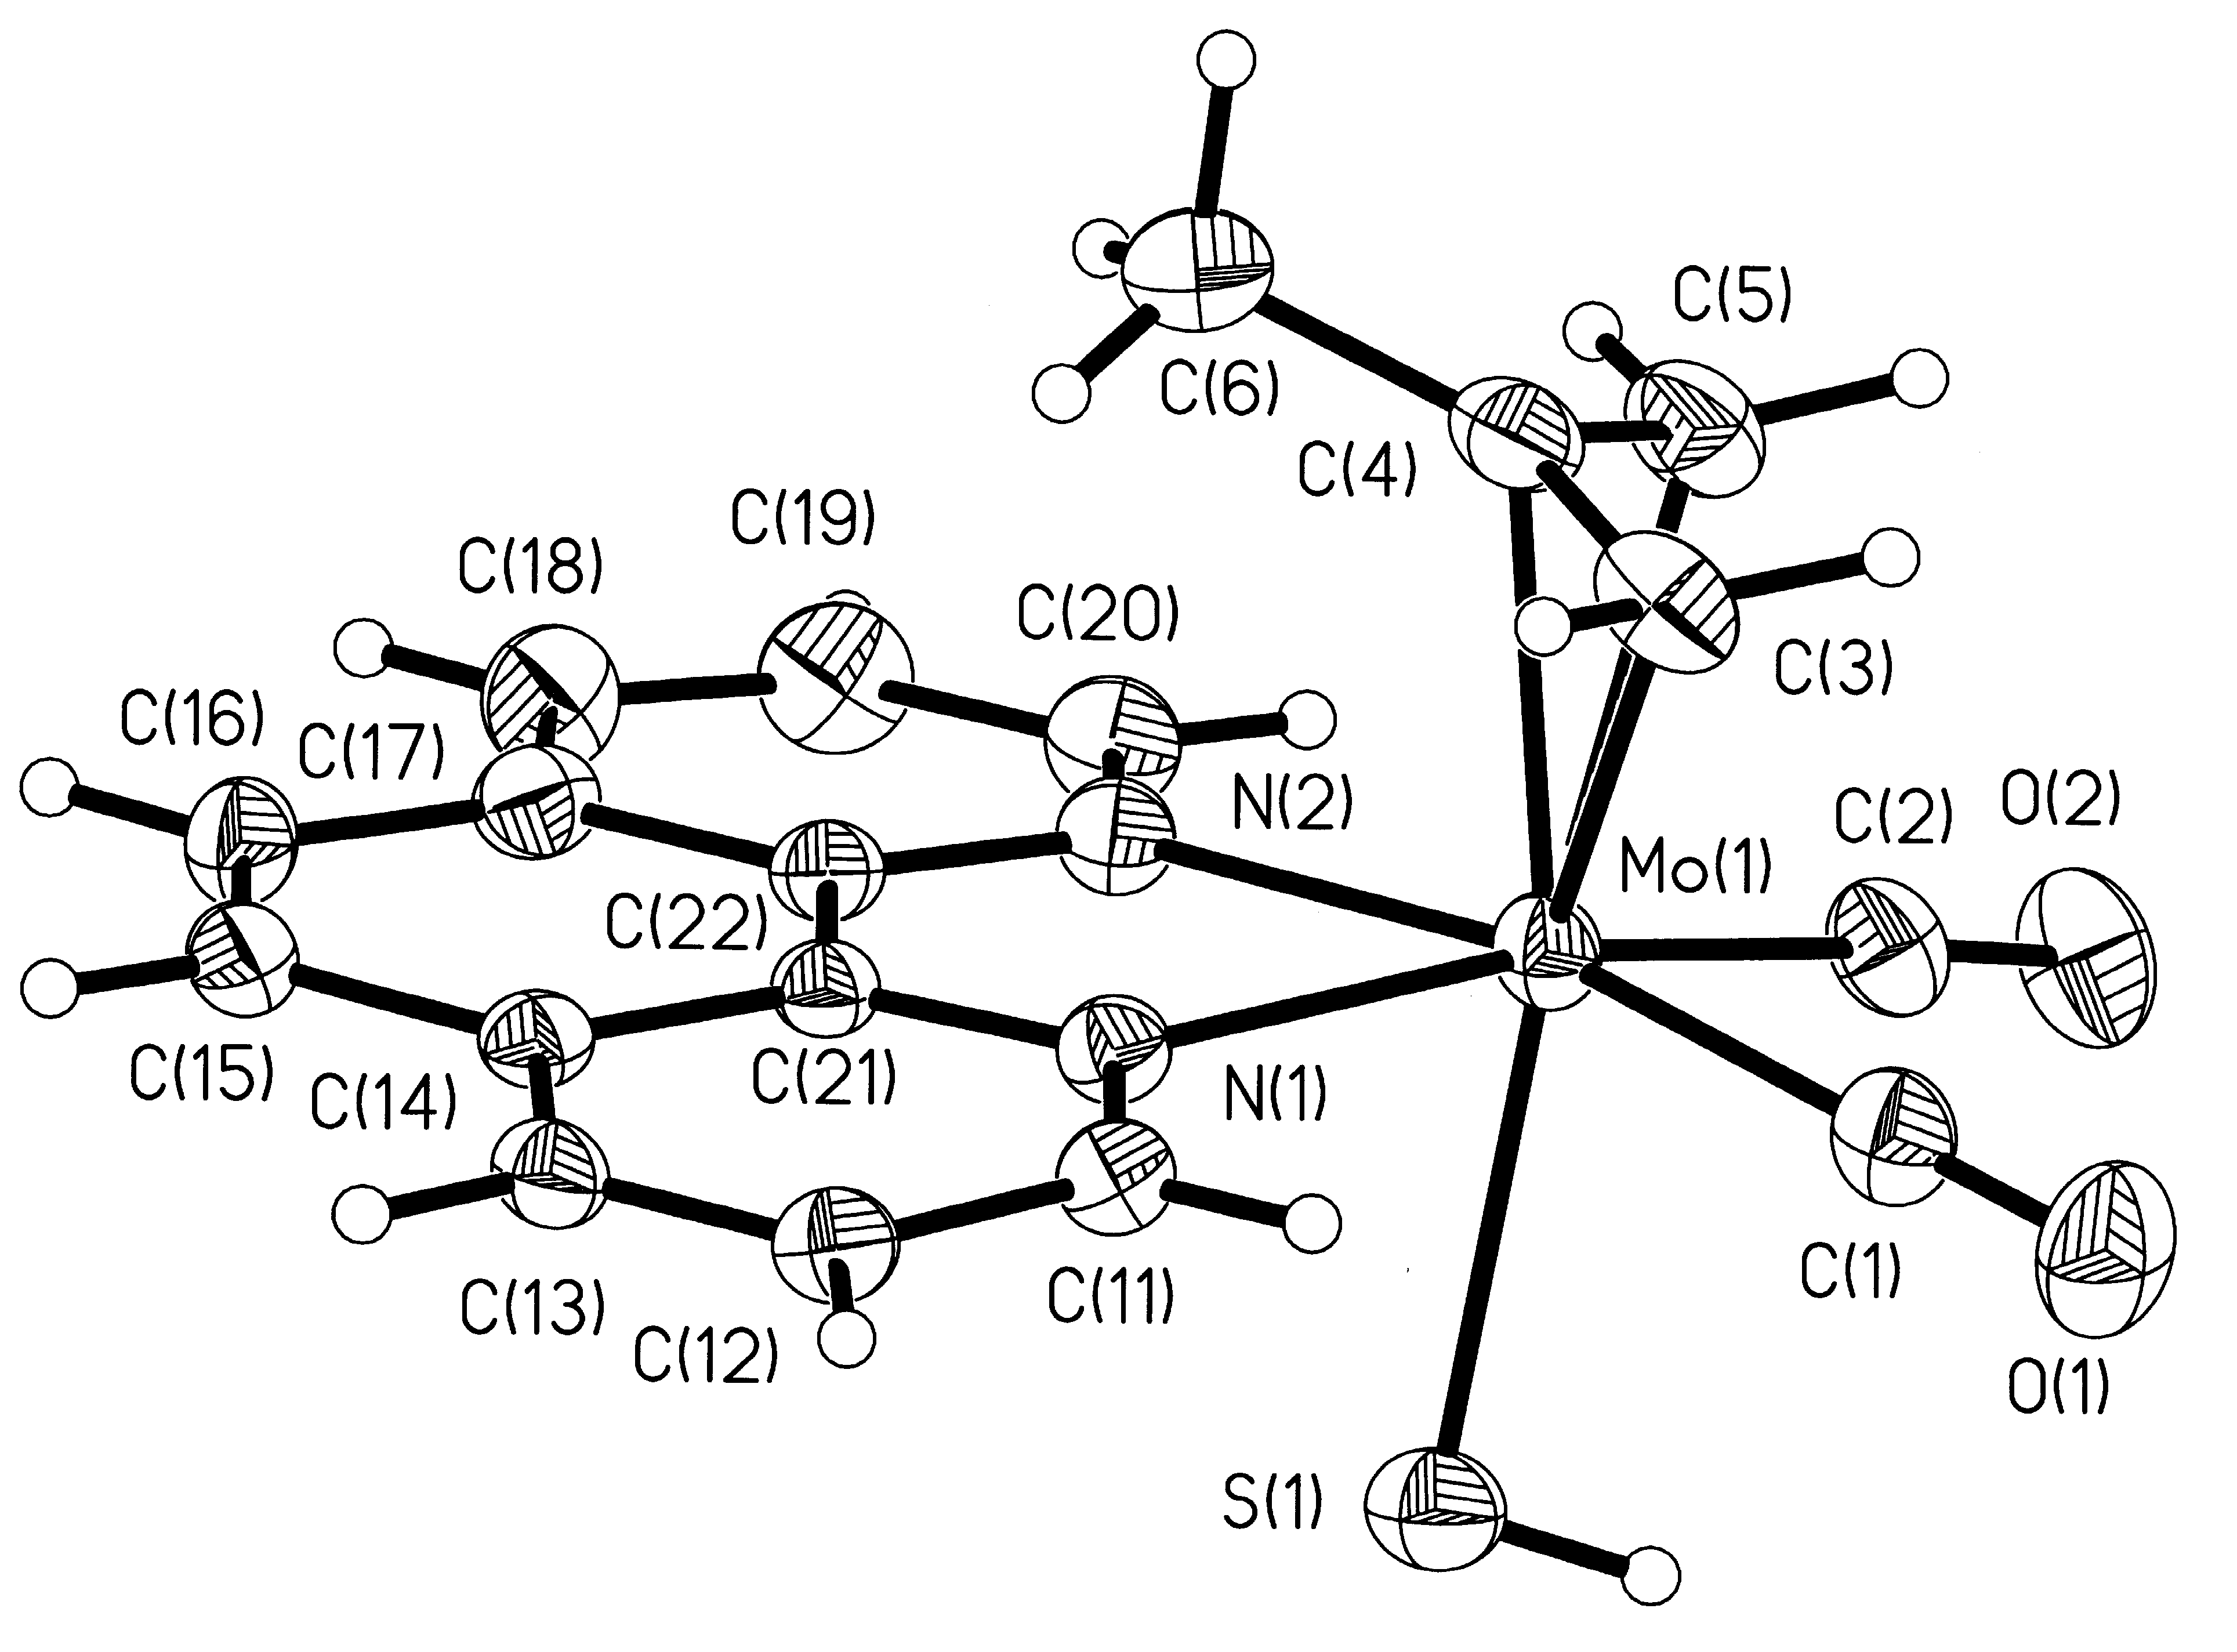


Molecular structure of **3**

Table 1. Crystal data and structure refinement for **3**.

Empirical formula C18 H16 Mo N2 O2 S

Formula weight 420.33

Temperature 299(2) K

Wavelength 0.71073 Å

Crystal system Monoclinic

Space group P2(1)/n

Unit cell dimensions a = 8.6005(10) Å = 90º.

b = 15.0923(17) Å = 101.228(2)º.

c = 13.5883(15)Å  = 90º.

Volume 1730.0(3) Å3

Z 4

Density (calculated) 1.614 Mg/m3

Absorption coefficient 0.891 mm-1

F(000) 848

Crystal size 0.14 x 0.16 x 0.21 mm3

Theta range for data collection 2.04 to 23.28º.

Index ranges -9<=h<=9, -16<=k<=16, -14<=l<=15

Reflections collected 7677

Independent reflections 2498 [R(int) = 0.0236]

Completeness to theta = 23.28∞ 99.8 %

Absorption correction SADABS

Max. and min. transmission 1.000000 and 0.859004

Refinement method Full-matrix least-squares on F2

Data / restraints / parameters 2498 / 0 / 221

Goodness-of-fit on F2 1.000

Final R indices [I>2sigma(I)] R1 = 0.0296, wR2 = 0.0787

R indices (all data) R1 = 0.0370, wR2 = 0.0829

Largest diff. peak and hole 0.800 and -0.261 e.Å-3

Table 2. Atomic coordinates ( x 104) and equivalent isotropic displacement parameters (Å2x 103)

for **3**. U(eq) is defined as one third of the trace of the orthogonalized Uij tensor.

________________________________________________________________________________

x y z U(eq)

________________________________________________________________________________

Mo(1) 1641(1) 2918(1) 7740(1) 41(1)

S(1) -131(1) 2435(1) 8902(1) 57(1)

N(1) 1864(3) 4138(2) 8719(2) 39(1)

N(2) -443(3) 3792(2) 7121(2) 44(1)

C(1) 3257(5) 2135(2) 8503(3) 53(1)

O(1) 4181(4) 1644(2) 8941(2) 80(1)

C(2) 1020(4) 1806(3) 7017(3) 52(1)

O(2) 638(3) 1145(2) 6628(2) 74(1)

C(3) 4119(5) 3374(3) 7501(3) 61(1)

C(4) 2931(5) 3671(3) 6703(3) 56(1)

C(5) 2119(5) 2986(3) 6115(3) 61(1)

C(6) 2572(6) 4637(3) 6477(4) 77(1)

C(11) 2938(4) 4270(2) 9547(2) 43(1)

C(12) 2961(4) 5031(2) 10147(2) 46(1)

C(13) 1855(4) 5668(2) 9866(2) 45(1)

C(14) 690(4) 5558(2) 8998(2) 40(1)

C(15) -530(4) 6196(2) 8651(3) 48(1)

C(16) -1662(4) 6041(2) 7832(3) 53(1)

C(17) -1705(4) 5217(3) 7292(2) 49(1)

C(18) -2899(5) 4993(3) 6471(3) 62(1)

C(19) -2866(5) 4194(3) 6030(3) 65(1)

C(20) -1624(4) 3614(3) 6357(3) 55(1)

C(21) 718(4) 4767(2) 8457(2) 36(1)

C(22) -504(4) 4585(2) 7596(2) 41(1)

________________________________________________________________________________

Table 3. Bond lengths [Å] and angles [º] for **3**.

_____________________________________________________

Mo(1)-C(1) 1.960(4)

Mo(1)-C(2) 1.965(4)

Mo(1)-N(2) 2.253(3)

Mo(1)-N(1) 2.257(3)

Mo(1)-C(4) 2.263(4)

Mo(1)-C(3) 2.322(4)

Mo(1)-C(5) 2.326(4)

Mo(1)-S(1) 2.5059(10)

N(1)-C(11) 1.324(4)

N(1)-C(21) 1.365(4)

N(2)-C(20) 1.331(4)

N(2)-C(22) 1.366(4)

C(1)-O(1) 1.162(5)

C(2)-O(2) 1.148(4)

C(3)-C(4) 1.411(6)

C(4)-C(5) 1.406(5)

C(4)-C(6) 1.509(6)

C(11)-C(12) 1.407(5)

C(12)-C(13) 1.354(5)

C(13)-C(14) 1.400(5)

C(14)-C(21) 1.405(4)

C(14)-C(15) 1.435(5)

C(15)-C(16) 1.348(5)

C(16)-C(17) 1.442(5)

C(17)-C(18) 1.402(5)

C(17)-C(22) 1.407(5)

C(18)-C(19) 1.349(6)

C(19)-C(20) 1.386(6)

C(21)-C(22) 1.438(5)

C(1)-Mo(1)-C(2) 81.10(15)

C(1)-Mo(1)-N(2) 168.95(13)

C(2)-Mo(1)-N(2) 101.19(13)

C(1)-Mo(1)-N(1) 102.15(12)

C(2)-Mo(1)-N(1) 167.05(13)

N(2)-Mo(1)-N(1) 73.28(10)

C(1)-Mo(1)-C(4) 104.43(16)

C(2)-Mo(1)-C(4) 103.65(15)

N(2)-Mo(1)-C(4) 85.63(12)

N(1)-Mo(1)-C(4) 87.80(12)

C(1)-Mo(1)-C(3) 71.14(16)

C(2)-Mo(1)-C(3) 110.52(15)

N(2)-Mo(1)-C(3) 117.36(14)

N(1)-Mo(1)-C(3) 82.30(12)

C(4)-Mo(1)-C(3) 35.83(14)

C(1)-Mo(1)-C(5) 106.88(15)

C(2)-Mo(1)-C(5) 69.14(15)

N(2)-Mo(1)-C(5) 83.93(12)

N(1)-Mo(1)-C(5) 120.86(12)

C(4)-Mo(1)-C(5) 35.67(14)

C(3)-Mo(1)-C(5) 61.14(14)

C(1)-Mo(1)-S(1) 87.00(12)

C(2)-Mo(1)-S(1) 85.84(11)

N(2)-Mo(1)-S(1) 82.42(8)

N(1)-Mo(1)-S(1) 81.85(7)

C(4)-Mo(1)-S(1) 166.02(10)

C(3)-Mo(1)-S(1) 149.50(11)

C(5)-Mo(1)-S(1) 148.46(11)

C(11)-N(1)-C(21) 117.7(3)

C(11)-N(1)-Mo(1) 126.1(2)

C(21)-N(1)-Mo(1) 116.09(19)

C(20)-N(2)-C(22) 116.9(3)

C(20)-N(2)-Mo(1) 127.1(2)

C(22)-N(2)-Mo(1) 116.0(2)

O(1)-C(1)-Mo(1) 177.5(3)

O(2)-C(2)-Mo(1) 177.3(4)

C(4)-C(3)-Mo(1) 69.8(2)

C(5)-C(4)-C(3) 114.0(4)

C(5)-C(4)-C(6) 122.4(4)

C(3)-C(4)-C(6) 123.6(4)

C(5)-C(4)-Mo(1) 74.6(2)

C(3)-C(4)-Mo(1) 74.4(2)

C(6)-C(4)-Mo(1) 120.5(3)

C(4)-C(5)-Mo(1) 69.7(2)

N(1)-C(11)-C(12) 123.0(3)

C(13)-C(12)-C(11) 119.1(3)

C(12)-C(13)-C(14) 120.1(3)

C(13)-C(14)-C(21) 117.4(3)

C(13)-C(14)-C(15) 123.7(3)

C(21)-C(14)-C(15) 119.0(3)

C(16)-C(15)-C(14) 121.3(3)

C(15)-C(16)-C(17) 120.8(3)

C(18)-C(17)-C(22) 116.9(3)

C(18)-C(17)-C(16) 123.7(3)

C(22)-C(17)-C(16) 119.4(3)

C(19)-C(18)-C(17) 119.6(4)

C(18)-C(19)-C(20) 120.3(4)

N(2)-C(20)-C(19) 123.0(4)

N(1)-C(21)-C(14) 122.7(3)

N(1)-C(21)-C(22) 117.1(3)

C(14)-C(21)-C(22) 120.2(3)

N(2)-C(22)-C(17) 123.2(3)

N(2)-C(22)-C(21) 117.5(3)

C(17)-C(22)-C(21) 119.2(3)

_____________________________________________________________

Symmetry transformations used to generate equivalent atoms:

Table 4. Anisotropic displacement parameters (Å2x 103) for **3**. The anisotropic

displacement factor exponent takes the form: -22[ h2 a*2U11 + ... + 2 h k a* b* U12 ]

______________________________________________________________________________

U11 U22 U33 U23 U13 U12

______________________________________________________________________________

Mo(1) 44(1) 42(1) 35(1) -6(1) 3(1) 2(1)

S(1) 67(1) 55(1) 50(1) -6(1) 16(1) -13(1)

N(1) 42(2) 40(2) 35(2) -1(1) 5(1) -3(1)

N(2) 45(2) 47(2) 37(2) -2(1) 3(1) 0(1)

C(1) 57(2) 51(2) 45(2) -10(2) 1(2) -1(2)

O(1) 81(2) 75(2) 72(2) 4(2) -12(2) 24(2)

C(2) 47(2) 59(2) 50(2) -11(2) 7(2) 3(2)

O(2) 78(2) 63(2) 78(2) -37(2) 8(2) -11(2)

C(3) 52(2) 75(3) 59(3) -15(2) 18(2) -6(2)

C(4) 58(2) 66(3) 48(2) 1(2) 23(2) 2(2)

C(5) 60(3) 78(3) 44(2) -9(2) 9(2) 8(2)

C(6) 91(3) 69(3) 81(3) 16(2) 42(3) 1(2)

C(11) 42(2) 44(2) 41(2) 1(2) 4(2) -2(2)

C(12) 52(2) 44(2) 40(2) -4(2) 7(2) -9(2)

C(13) 57(2) 38(2) 44(2) -8(2) 20(2) -10(2)

C(14) 43(2) 38(2) 43(2) 3(2) 17(2) -7(2)

C(15) 55(2) 41(2) 50(2) -2(2) 20(2) 0(2)

C(16) 51(2) 48(2) 63(3) 7(2) 17(2) 11(2)

C(17) 44(2) 55(2) 49(2) 10(2) 10(2) 3(2)

C(18) 49(2) 73(3) 61(3) 4(2) -1(2) 10(2)

C(19) 51(2) 83(3) 53(2) -1(2) -11(2) 0(2)

C(20) 57(2) 60(2) 43(2) -6(2) -1(2) -2(2)

C(21) 39(2) 36(2) 36(2) 2(1) 11(1) -3(1)

C(22) 41(2) 44(2) 38(2) 6(2) 11(1) 1(2)

______________________________________________________________________________

Table 5. Hydrogen coordinates ( x 104) and isotropic displacement parameters (Å2x 10 3)

for **3**.

________________________________________________________________________________

x y z U(eq)

________________________________________________________________________________

H(1) -48 1786 8853 85

H(3A) 4650 3823 7957 74

H(3B) 4824 2915 7345 74

H(5A) 2763 2516 5916 73

H(5B) 1235 3159 5593 73

H(6A) 3293 4866 6082 116

H(6B) 2691 4962 7094 116

H(6C) 1504 4697 6110 116

H(11) 3713 3841 9740 52

H(12) 3725 5096 10730 55

H(13) 1869 6180 10249 54

H(15) -541 6726 8998 57

H(16) -2424 6472 7614 64

H(18) -3708 5392 6233 75

H(19) -3680 4032 5505 78

H(20) -1615 3075 6026 65

________________________________________________________________________________

Molecular structure of **4**

Table 6. Crystal data and structure refinement for **4**.

Empirical formula C13 H9 N2 O3 Re S

Formula weight 459.48

Temperature 299(2) K

Wavelength 0.71073Å

Crystal system Triclinic

Space group P-1

Unit cell dimensions a = 8.174(5) Å = 100.773(9)º.

b = 8.372(5) Å = 103.413(9)º.

c = 10.931(7) Å  = 93.959(9)º.

Volume 709.8(8) Å3

Z 2

Density (calculated) 2.150 Mg/m3

Absorption coefficient 8.713 mm-1

F(000) 432

Crystal size 0.05 x 0.11 x 0.17 mm3

Theta range for data collection 1.96 to 23.62º.

Index ranges -9<=h<=6, -9<=k<=9, -12<=l<=12

Reflections collected 3249

Independent reflections 2051 [R(int) = 0.0251]

Completeness to theta = 23.62∞ 95.6 %

Absorption correction SADABS

Max. and min. transmission 1.000000 and 0.589750

Refinement method Full-matrix least-squares on F2

Data / restraints / parameters 2051 / 0 / 185

Goodness-of-fit on F2 1.018

Final R indices [I>2sigma(I)] R1 = 0.0279, wR2 = 0.0662

R indices (all data) R1 = 0.0316, wR2 = 0.0675

Extinction coefficient 0.0006(4)

Largest diff. peak and hole 1.420 and -0.979 e.≈-3

Table 7. Atomic coordinates ( x 104) and equivalent isotropic displacement parameters (Å2x 103)

for **4**. U(eq) is defined as one third of the trace of the orthogonalized Uij tensor.

________________________________________________________________________________

x y z U(eq)

________________________________________________________________________________

Re(1) 2378(1) 3017(1) 3062(1) 31(1)

S(1) 2550(3) 1378(3) 930(2) 48(1)

N(1) 710(7) 905(7) 3124(6) 33(1)

N(2) -146(7) 3366(6) 2018(5) 31(1)

C(1) 2161(8) 4292(8) 4686(9) 38(2)

O(1) 2021(8) 5049(7) 5625(6) 56(2)

C(2) 3629(9) 4884(10) 2800(8) 44(2)

O(2) 4377(8) 6029(8) 2632(6) 68(2)

C(3) 4476(9) 2354(9) 3945(8) 42(2)

O(3) 5671(7) 1873(8) 4434(7) 72(2)

C(11) 1232(10) -346(8) 3684(7) 41(2)

C(12) 154(10) -1640(9) 3724(8) 49(2)

C(13) -1558(12) -1712(9) 3170(8) 52(2)

C(14) -2125(9) -437(9) 2582(8) 43(2)

C(15) -952(9) 854(8) 2572(7) 33(2)

C(16) -1435(8) 2213(8) 1910(6) 31(2)

C(17) -3055(9) 2327(9) 1233(8) 46(2)

C(18) -3390(9) 3590(10) 623(8) 49(2)

C(19) -2093(10) 4786(10) 741(8) 50(2)

C(20) -507(9) 4652(9) 1436(7) 39(2)

________________________________________________________________________________

Table 8. Bond lengths [Å] and angles [º] for **4**.

_____________________________________________________

Re(1)-C(2) 1.911(8)

Re(1)-C(3) 1.935(7)

Re(1)-C(1) 1.946(9)

Re(1)-N(1) 2.178(6)

Re(1)-N(2) 2.182(5)

Re(1)-S(1) 2.514(2)

N(1)-C(15) 1.346(9)

N(1)-C(11) 1.355(8)

N(2)-C(16) 1.347(8)

N(2)-C(20) 1.365(9)

C(1)-O(1) 1.135(9)

C(2)-O(2) 1.168(9)

C(3)-O(3) 1.138(8)

C(11)-C(12) 1.362(10)

C(12)-C(13) 1.382(12)

C(13)-C(14) 1.398(10)

C(14)-C(15) 1.398(9)

C(15)-C(16) 1.487(9)

C(16)-C(17) 1.378(10)

C(17)-C(18) 1.363(11)

C(18)-C(19) 1.374(11)

C(19)-C(20) 1.366(10)

C(2)-Re(1)-C(3) 89.4(3)

C(2)-Re(1)-C(1) 89.6(3)

C(3)-Re(1)-C(1) 89.9(3)

C(2)-Re(1)-N(1) 172.4(3)

C(3)-Re(1)-N(1) 97.2(3)

C(1)-Re(1)-N(1) 94.2(2)

C(2)-Re(1)-N(2) 98.9(3)

C(3)-Re(1)-N(2) 171.1(2)

C(1)-Re(1)-N(2) 93.5(2)

N(1)-Re(1)-N(2) 74.3(2)

C(2)-Re(1)-S(1) 91.0(2)

C(3)-Re(1)-S(1) 92.1(2)

C(1)-Re(1)-S(1) 177.97(19)

N(1)-Re(1)-S(1) 85.04(16)

N(2)-Re(1)-S(1) 84.48(15)

C(15)-N(1)-C(11) 118.2(6)

C(15)-N(1)-Re(1) 117.4(4)

C(11)-N(1)-Re(1) 124.4(5)

C(16)-N(2)-C(20) 117.5(6)

C(16)-N(2)-Re(1) 117.9(4)

C(20)-N(2)-Re(1) 124.6(5)

O(1)-C(1)-Re(1) 179.1(6)

O(2)-C(2)-Re(1) 179.2(7)

O(3)-C(3)-Re(1) 176.1(7)

N(1)-C(11)-C(12) 123.1(7)

C(11)-C(12)-C(13) 119.7(7)

C(12)-C(13)-C(14) 118.3(7)

C(15)-C(14)-C(13) 119.2(7)

N(1)-C(15)-C(14) 121.6(6)

N(1)-C(15)-C(16) 115.7(6)

C(14)-C(15)-C(16) 122.7(6)

N(2)-C(16)-C(17) 121.2(6)

N(2)-C(16)-C(15) 114.6(6)

C(17)-C(16)-C(15) 124.2(6)

C(18)-C(17)-C(16) 120.8(7)

C(17)-C(18)-C(19) 118.6(7)

C(20)-C(19)-C(18) 119.2(7)

N(2)-C(20)-C(19) 122.7(7)

_____________________________________________________________

Symmetry transformations used to generate equivalent atoms:

Table 9. Anisotropic displacement parameters (Å2x 103) for **4**. The anisotropic

displacement factor exponent takes the form: -22[ h2 a*2U11 + ... + 2 h k a* b* U12 ]

______________________________________________________________________________

U11 U22 U33 U23 U13 U12

______________________________________________________________________________

Re(1) 25(1) 34(1) 33(1) 8(1) 4(1) 3(1)

S(1) 40(1) 59(1) 39(1) -2(1) 12(1) 0(1)

N(1) 35(3) 33(3) 32(4) 8(3) 6(3) 9(3)

N(2) 31(3) 31(3) 27(3) 2(3) 5(2) 5(2)

C(1) 27(4) 26(4) 60(6) 20(4) 1(4) -1(3)

O(1) 71(4) 48(3) 47(4) 4(3) 18(3) 5(3)

C(2) 32(4) 61(5) 38(5) 13(4) 4(3) 8(4)

O(2) 61(4) 68(4) 75(5) 30(4) 12(3) -18(3)

C(3) 33(4) 45(4) 42(5) 10(4) -2(3) 1(3)

O(3) 40(3) 75(4) 94(5) 31(4) -13(3) 19(3)

C(11) 44(4) 38(4) 45(5) 15(4) 10(4) 10(3)

C(12) 54(5) 39(4) 55(6) 16(4) 13(4) 6(4)

C(13) 75(6) 34(4) 47(5) 10(4) 19(5) -5(4)

C(14) 37(4) 41(4) 44(5) 5(4) 6(4) -9(3)

C(15) 39(4) 31(4) 32(4) 6(3) 12(3) 6(3)

C(16) 28(4) 35(4) 27(4) 3(3) 6(3) 6(3)

C(17) 30(4) 50(5) 61(6) 15(4) 11(4) 10(3)

C(18) 32(4) 56(5) 54(6) 11(4) -1(4) 15(4)

C(19) 51(5) 53(5) 56(6) 24(4) 17(4) 27(4)

C(20) 38(4) 45(4) 35(4) 13(4) 8(3) 9(3)

______________________________________________________________________________

Table 10. Hydrogen coordinates ( x 104) and isotropic displacement parameters (Å2x 10 3)

for **4**.

________________________________________________________________________________

x y z U(eq)

________________________________________________________________________________

H(1) 1147 904 270 71

H(11) 2381 -321 4059 49

H(12) 568 -2471 4122 58

H(13) -2313 -2586 3188 62

H(14) -3270 -447 2202 51

H(17) -3930 1532 1193 56

H(18) -4475 3641 137 59

H(19) -2291 5676 352 60

H(20) 363 5472 1517 47

________________________________________________________________________________

1. SAINT+. SAX area detector integration program. Version 6.02. Bruker AXS, Inc. Madison, WI, 1999. [↑](#footnote-ref-2)
2. G. M. Sheldrick, SHELXTL, An integrated system for solving, refining, and displaying crystal structures from diffraction data. Version 5.1. Bruker AXS, Inc. Madison, WI, 1998. [↑](#footnote-ref-3)
3. G. M. Sheldrick, SADABS, Empirical Absorption Correction Program. University of Göttingen: Göttingen, Germany, 1997. [↑](#footnote-ref-4)
